# Supplementary material for: Intersection of Race-Ethnicity and Gender in Depression Care: Screening, Access, and Minimally Adequate Treatment
Source: Atypon-hosted journal article supplement (doi:10.1176/appi.ps.201400116), 2014-12-17
Supplement: appi.ps.201400116.ds001.pdf [file appi.ps.201400116.ds001.pdf]

## Appendix

Included in this Appendix is the sensitivity analysis (Table A1) as requested by the reviewers (Reviewer 1, Comment 3; Reviewer 2, Comment 2).

Table A1. IOM-Concordant Predicted Rates of Adequate Care by Race and Gender using Alternative Definition of Adequate Care

|                                                |             | Adequate Care Given Any MH Care (n=3,067) |               |              |              | Adequate Care (>=2 visits) Given Any MH Care (n=3,067)<br>[Sensitivity Test] |               |              |              |        |        |       |        |
|------------------------------------------------|-------------|-------------------------------------------|---------------|--------------|--------------|------------------------------------------------------------------------------|---------------|--------------|--------------|--------|--------|-------|--------|
|                                                |             | Male                                      |               | Female       |              | Male                                                                         |               | Female       |              |        |        |       |        |
|                                                |             | Estimate                                  | SE            | Estimate     | SE           | Estimate                                                                     | SE            | Estimate     | SE           |        |        |       |        |
| Race/Ethnicity                                 | white       | 27.93%                                    | 1.97%         | 24.49%       | 1.30%        | 59.20%                                                                       | 2.30%         | 58.50%       | 1.50%        |        |        |       |        |
|                                                | black       | 35.83%                                    | 4.48%         | 26.11%       | 2.58%        | 61.20%                                                                       | 4.50%         | 54.50%       | 2.60%        |        |        |       |        |
|                                                | latino      | 22.48%                                    | 2.72%         | 26.67%       | 1.55%        | 58.90%                                                                       | 3.40%         | 63.20%       | 1.70%        |        |        |       |        |
|                                                | asian       | 32.54%                                    | 8.27%         | 26.75%       | 5.33%        | 67.90%                                                                       | 9.30%         | 48.90%       | 5.40%        |        |        |       |        |
| Race/Ethnicity<br>Differences Within<br>Gender | w-b diff    | -7.90%                                    | 4.89%         | p=.11        | -1.62%       | 2.89%                                                                        | p=.57         | -2.00%       | 5.05%        | p=.689 | 4.00%  | 3.00% | p=.184 |
|                                                | w-l diff    | 5.45%                                     | 3.36%         | p=.10        | -2.18%       | 2.02%                                                                        | p=.28         | 0.30%        | 4.10%        | p=.944 | -4.70% | 2.27% | p=.038 |
|                                                | w-a diff    | -4.61%                                    | 8.50%         | p=.59        | -2.26%       | 5.49%                                                                        | p=.68         | -8.70%       | 9.58%        | p=.363 | 9.60%  | 5.60% | p=.085 |
| Gender Differences<br>within Race/Ethnicity    | white diff  |                                           | Estimate      | SE           |              |                                                                              | Estimate      | SE           |              |        |        |       |        |
|                                                | black diff  |                                           | <b>-3.44%</b> | 2.37%        | p=.15        |                                                                              | <b>-9.72%</b> | <b>5.02%</b> | <b>p=.05</b> |        | -0.70% | 2.90% | p=.810 |
|                                                | latino diff |                                           | 4.19%         | 3.28%        | p=.20        |                                                                              | -6.70%        | 5.00%        | p=.180       |        | 4.30%  | 4.10% | p=.294 |
|                                                | asian diff  |                                           | -5.79%        | 10.27%       | p=.57        |                                                                              | -19.00%       | 11.00%       | p=.086       |        |        |       |        |
| Difference-in-Difference                       | wb dd       |                                           | 6.28%         | 5.22%        | p=.23        |                                                                              | 6.00%         | 5.60%        | p=.285       |        |        |       |        |
|                                                | wl dd       |                                           | <b>-7.63%</b> | <b>3.78%</b> | <b>p=.04</b> |                                                                              | -5.00%        | 4.80%        | p=.298       |        |        |       |        |
|                                                | wa dd       |                                           | 2.35%         | 10.50%       | p=.82        |                                                                              | 18.30%        | 11.30%       | p=.105       |        |        |       |        |

Differences in bold are significant at the p<.05 level

**Figure 1. IOM-Concordant Rates for Screening, Any MH Care, and Minimally Adequate Care by Race and Gender Adjusting for Age and Severity**

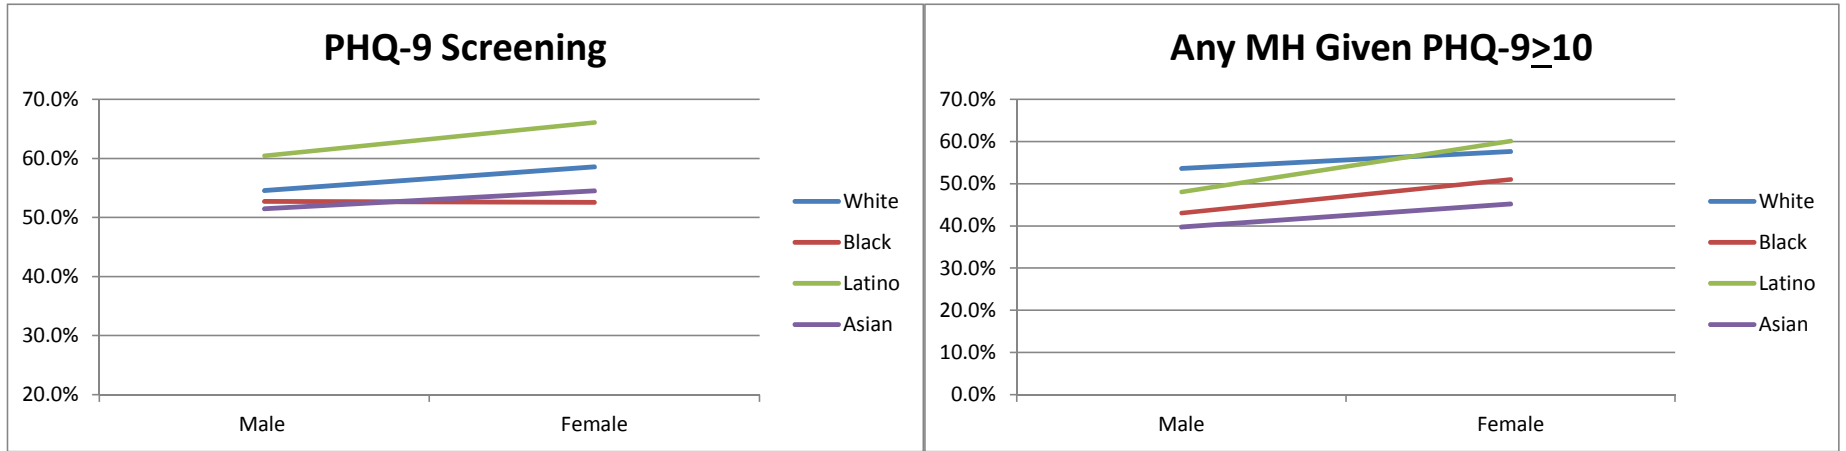

\*\*White females are more likely to get screened than White males. This is not true for Blacks and the difference-in-difference is significant.

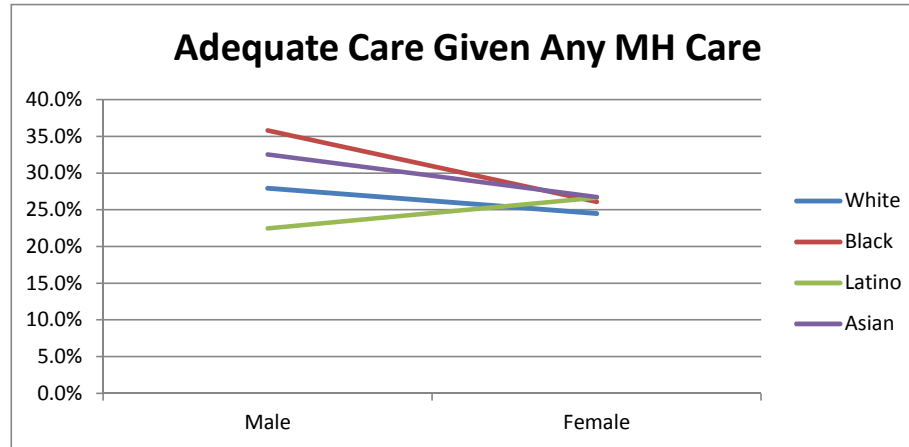

\*\*White females are less likely to receive adequate care than White males. This pattern is opposite for Latinos and the difference in patterns is marginally significant (p=.06)
